# Supplementary material
Source: PubMed Central journal article supplement (PMC3017134)
Supplement: 1009199108_pnas.201009199SI.pdf [file 1009199108_pnas.201009199SI.pdf]

# Supporting Information

Janeway et al. 10.1073/pnas.1009199108

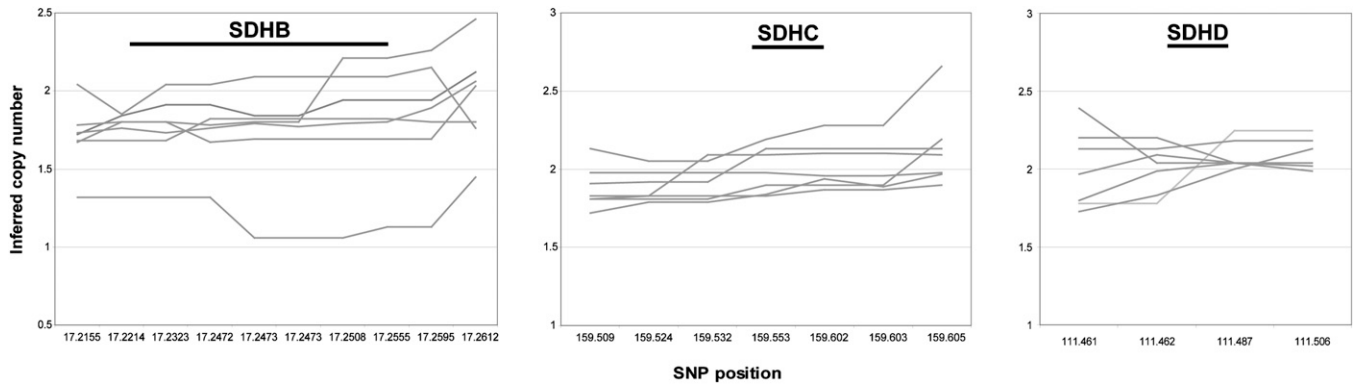

Fig. S1. Inferred copy number at the succinate dehydrogenase subunit B (*SDHB*), *SDHC*, and *SDHD* loci.

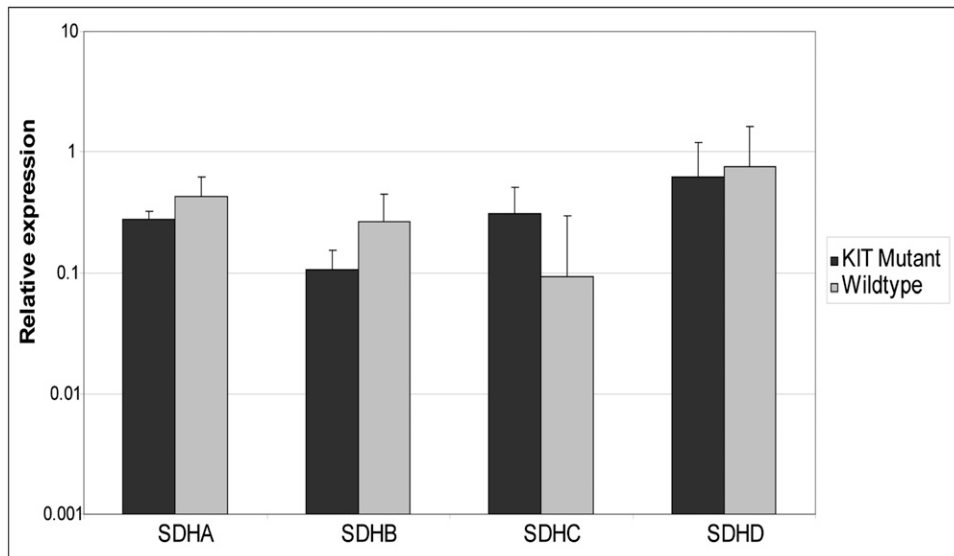

Fig. S2. Expression of *SDHA*, *SDHB*, *SDHC*, and *SDHD* mRNA relative to  $\beta$ -actin.

**Table S1. Baseline characteristics and results for each gastrointestinal stromal tumor case included in the study**

| Case | Age (y) | SDHx genotype source | SDHB/C/D mutation   | SDH IHC score | SDH Western blot | SDHAF2 mutation | SDHA mutation |
|------|---------|----------------------|---------------------|---------------|------------------|-----------------|---------------|
| 1    | 5       | Germline             | None                | ND            | ND               | None            | ND            |
| 2    | 7       | Germline             | (SDHD c. 34 G > A)  | ND            | ND               | None            | ND            |
| 3    | 8       | Germline             | None                | 0             | ND               | None            | ND            |
| 4    | 9       | ND                   | ND                  | 0             | ND               | ND              | ND            |
| 5    | 9       | Germline             | None                | ND            | ND               | None            | ND            |
| 6    | 10      | Tumor                | None                | 0             | Absent           | None            | ND            |
| 7    | 10      | Tumor                | None                | 0             | ND               | ND              | ND            |
| 8    | 10      | Tumor                | None                | 0             | ND               | ND              | ND            |
| 9    | 10      | Tumor                | None                | 0             | ND               | ND              | ND            |
| 10   | 10      | Tumor                | None                | 0             | ND               | ND              | ND            |
| 11   | 10      | Germline             | None                | ND            | ND               | None            | ND            |
| 12   | 11      | Germline             | None                | 0             | ND               | None            | ND            |
| 13   | 12      | Germline             | None                | ND            | ND               | None            | ND            |
| 14   | 12      | Germline             | None                | ND            | ND               | None            | ND            |
| 15   | 12      | Tumor                | None                | ND            | Absent           | None            | None          |
| 16   | 14      | Tumor                | None                | 0             | ND               | ND              | ND            |
| 17   | 14      | Germline             | None                | ND            | ND               | None            | ND            |
| 18   | 14      | Tumor                | None                | ND            | Absent           | None            | ND            |
| 19   | 14      | Tumor                | None                | ND            | Absent           | None            | ND            |
| 20   | 15      | Tumor                | None                | ND            | Absent           | None            | ND            |
| 21   | 16      | Tumor                | None                | 0             | Absent           | None            | None          |
| 22   | 16      | Tumor                | None                | 0             | Absent           | None            | None          |
| 23   | 16      | Germline             | None                | 0             | ND               | None            | ND            |
| 24   | 16      | Germline             | SDHC c. 405+1 G > A | ND            | ND               | None            | ND            |
| 25   | 17      | Tumor                | None                | 0             | Absent           | None            | None          |
| 26   | 18      | Tumor                | None                | 0             | ND               | ND              | ND            |
| 27   | 18      | Germline             | SDHB c.274 T > A/T  | 0             | ND               | None            | ND            |
| 28   | 19      | Germline             | None                | 0             | ND               | None            | ND            |
| 29   | 20      | Germline             | None                | ND            | ND               | None            | ND            |
| 30   | 21      | Tumor                | None                | 0             | ND               | ND              | ND            |
| 31   | 21      | Germline             | SDHB c. 725 G > A/G | ND            | ND               | None            | ND            |
| 32   | 21      | Germline             | None                | ND            | ND               | None            | ND            |
| 33   | 22      | Germline             | SDHB c. 600 G > G/T | 0             | ND               | None            | ND            |
| 34   | 22      | ND                   | ND                  | 0             | ND               | ND              | ND            |
| 35   | 23      | Tumor                | None                | 0             | ND               | ND              | ND            |
| 36   | 24      | Germline             | None                | ND            | ND               | None            | ND            |
| 37   | 25      | Tumor                | None                | 0             | ND               | ND              | ND            |
| 38   | 26      | Germline             | None                | 0             | ND               | None            | ND            |
| 39   | 27      | Germline             | None                | 1+            | ND               | None            | ND            |
| 40   | 27      | Germline             | None                | ND            | ND               | None            | ND            |
| 41   | 28      | Germline             | None                | ND            | ND               | None            | ND            |
| 42   | 30      | Germline             | None                | ND            | ND               | None            | ND            |
| 43   | 30      | Germline             | None                | ND            | ND               | None            | ND            |
| 44   | 31      | Germline             | None                | 0             | ND               | None            | ND            |
| 45   | 34      | Germline             | None                | ND            | ND               | None            | ND            |
| 46   | 41      | Germline             | None                | ND            | ND               | None            | ND            |
| 47   | 46      | Germline             | None                | ND            | ND               | None            | ND            |
| 48   | 49      | ND                   | ND                  | 0             | ND               | ND              | ND            |
| 49   | 54      | Germline             | None                | ND            | ND               | None            | ND            |
| 50   | 55      | Germline             | None                | ND            | ND               | None            | ND            |
| 51   | 56      | Germline             | None                | ND            | ND               | None            | ND            |
| 52   | 56      | ND                   | ND                  | 1+            | ND               | ND              | ND            |
| 53   | 57      | Germline             | None                | 1+            | ND               | None            | ND            |
| 54   | 57      | Germline             | None                | ND            | ND               | None            | ND            |
| 55   | 58      | Germline             | (SDHD c. 34 G > A)  | 1+            | ND               | None            | ND            |
| 56   | 63      | ND                   | ND                  | 1+            | ND               | ND              | ND            |

SDH, succinate dehydrogenase; IHC, immunohistochemistry; ND, not done.
